# Supplementary material for: Diagnosing and mitigating method-based avidity artifacts that confound polyubiquitin-binding assays
Source: PubMed Central journal article supplement — Biophys Rep (N Y). 2021 Nov 12;1(2):100033. doi: 10.1016/j.bpr.2021.100033 (PMC9680732; doi:10.1016/j.bpr.2021.100033), 2021-11-12
Supplement: mmc1.pdf [file mmc1.pdf]

**Biophysical Reports, Volume 1**

**Supplemental information**

**Diagnosing and mitigating method-based avidity artifacts that confound polyubiquitin-binding assays**

**Allyn J. Schoeffler, Elizabeth Helgason, Nataliya Popovych, and Erin C. Dueber**

## Supplemental Materials

### **Diagnosing and mitigating method-based avidity artifacts that confound polyubiquitin binding assays**

Allyn J. Schoeffler<sup>1,2</sup>, Elizabeth Helgason<sup>1</sup>, Nataliya Popovych<sup>1</sup>, Erin C. Dueber<sup>1\*</sup>

<sup>1</sup>Department of Early Discovery Biochemistry, Genentech, 1 DNA Way, South San Francisco, CA 94080

<sup>2</sup>Present address: Department of Chemistry and Biochemistry, Loyola University, New Orleans, 6363 St. Charles Ave New Orleans, LA 70118

\*Correspondence: [dueber.erin@gene.com](mailto:dueber.erin@gene.com)

**Fig. S1**

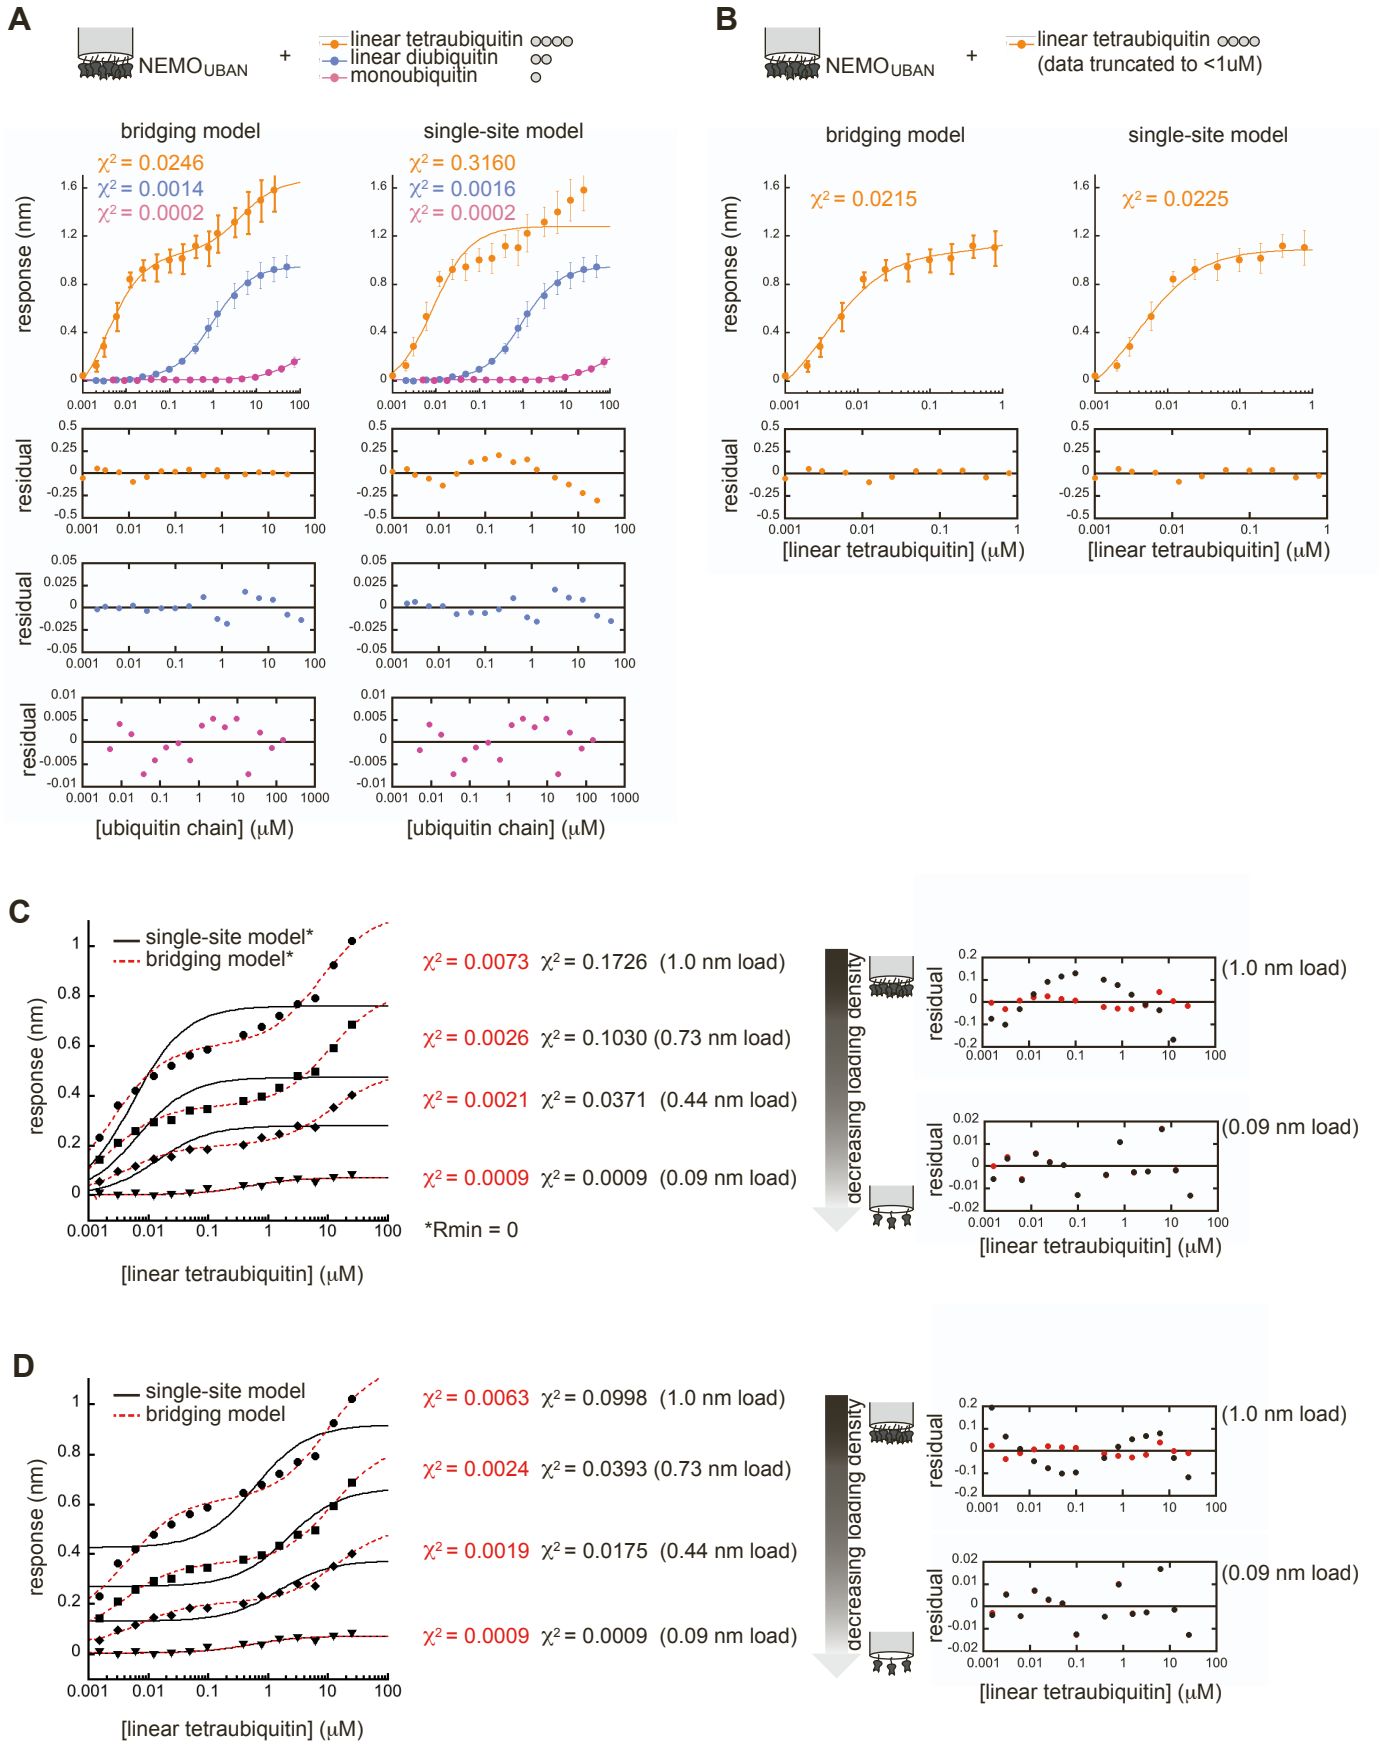

**Fig. S2**

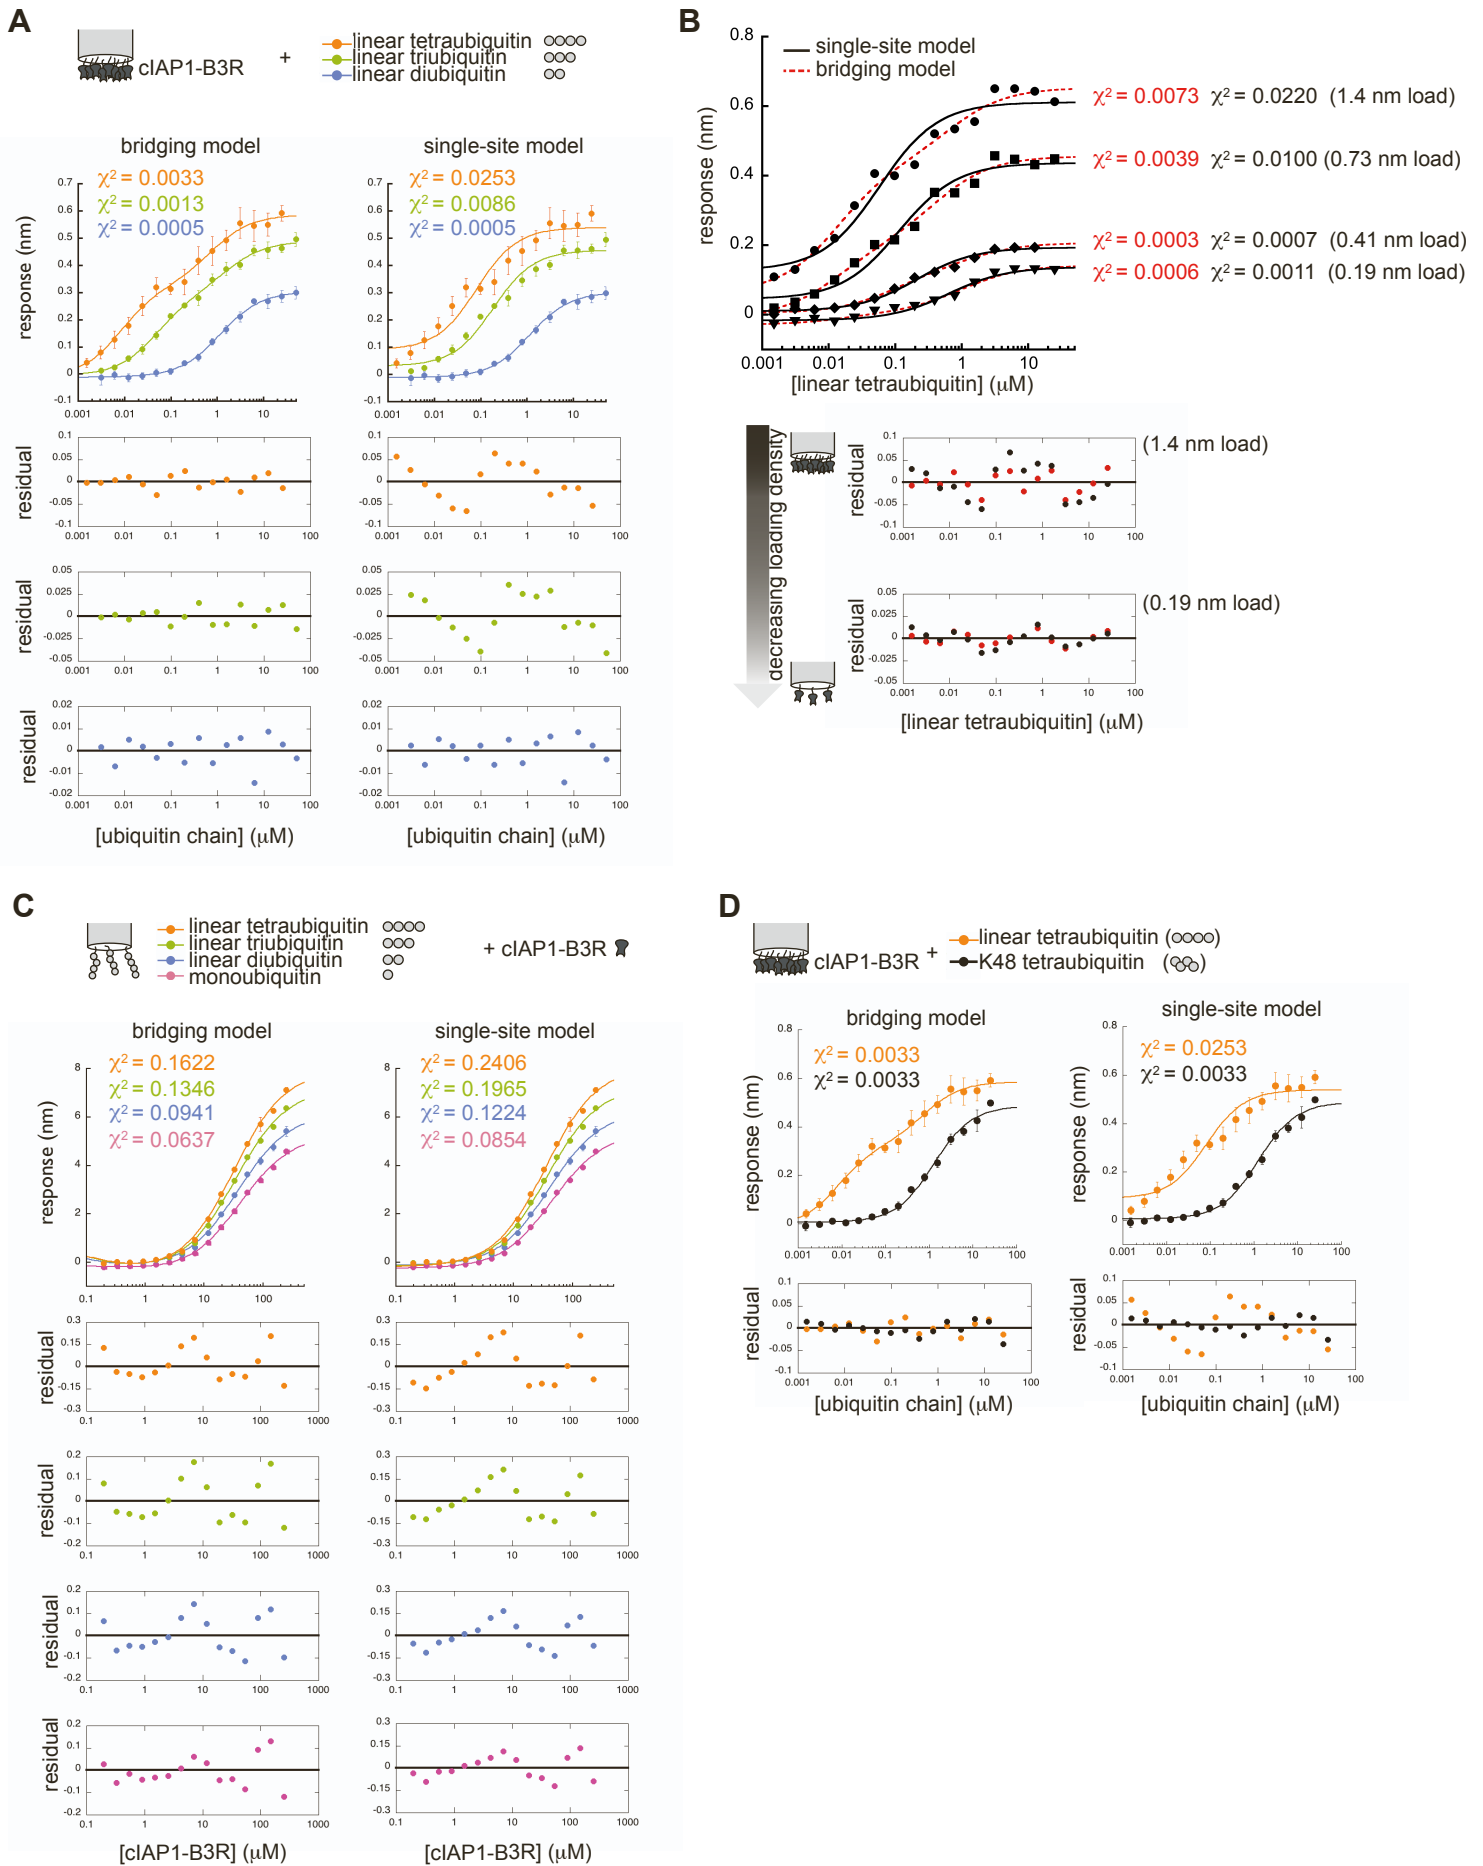

**Fig. S3**

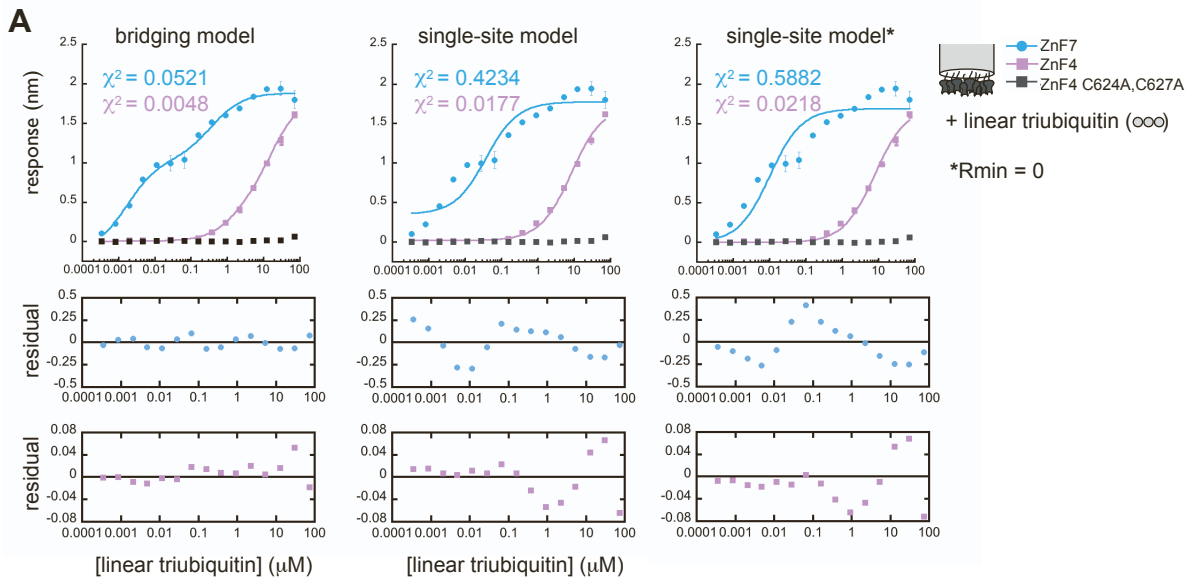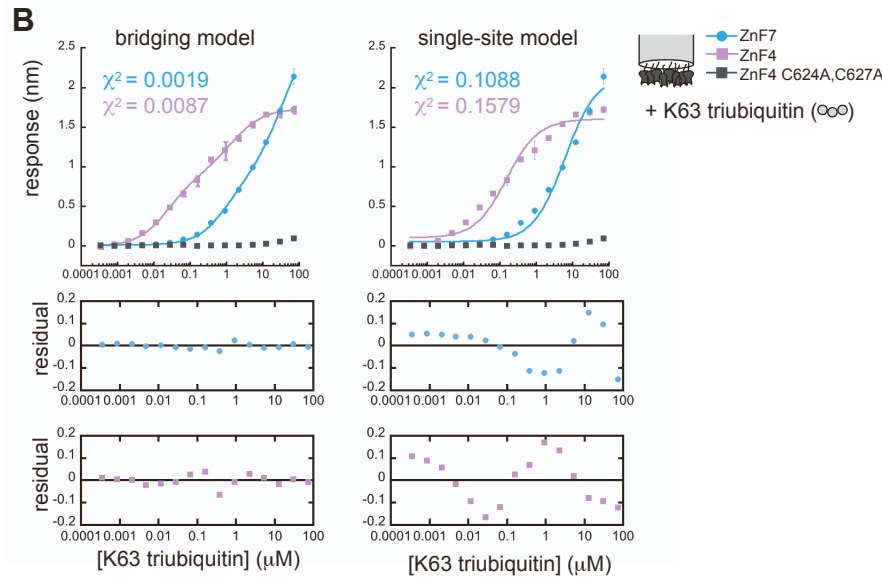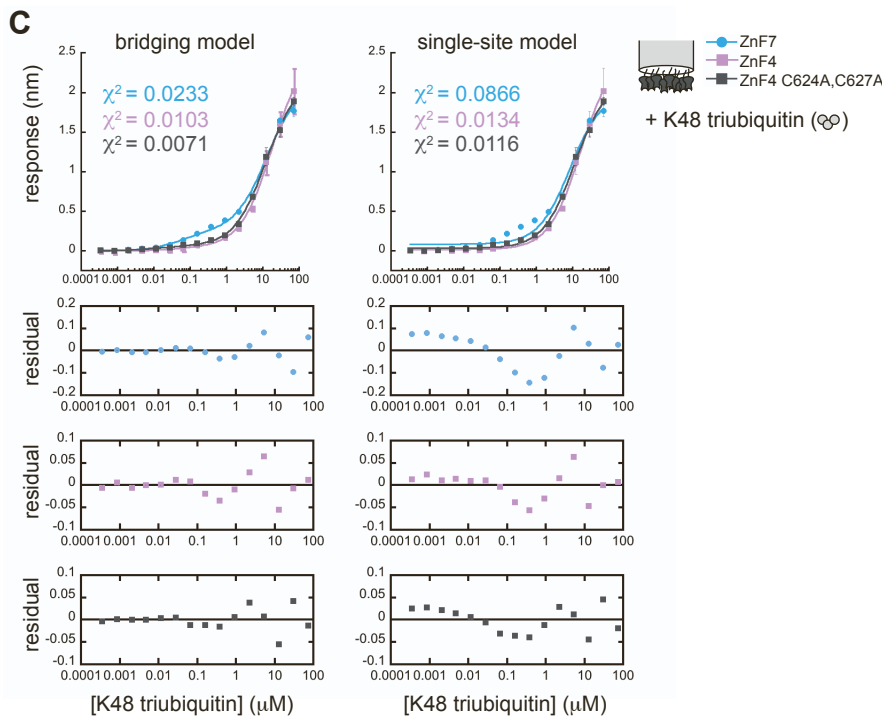

**Fig. S4**

**A**

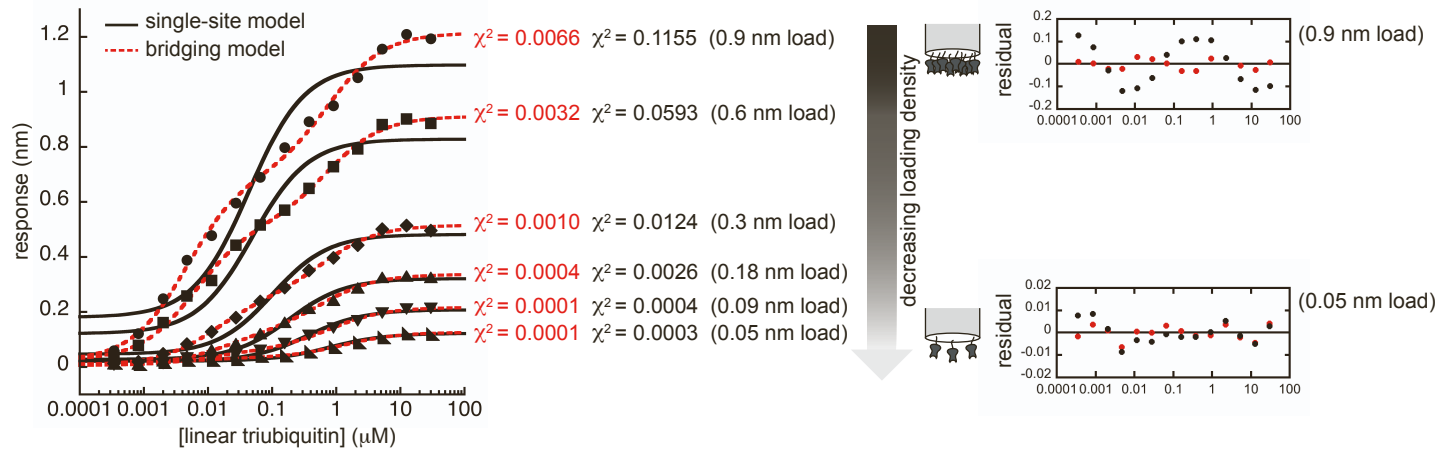

**B**

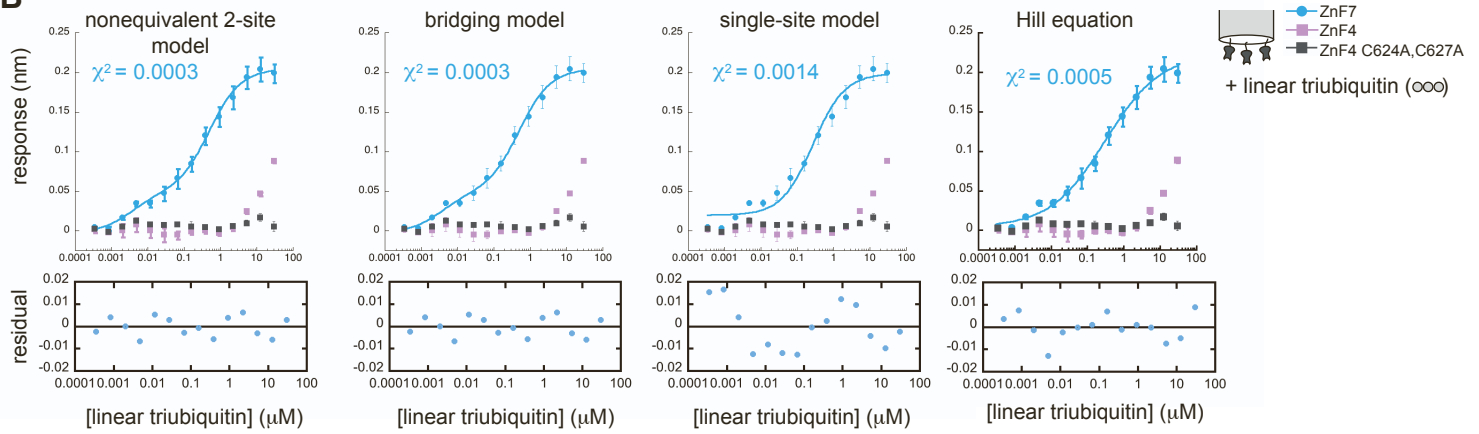

**C**

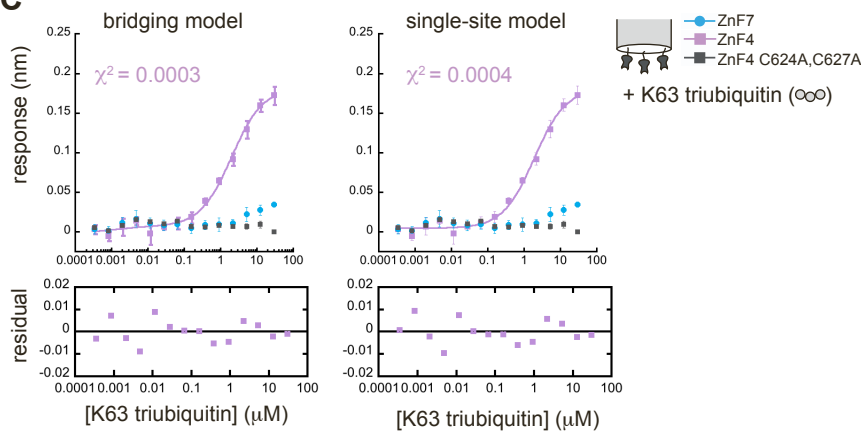

**Fig. S5**

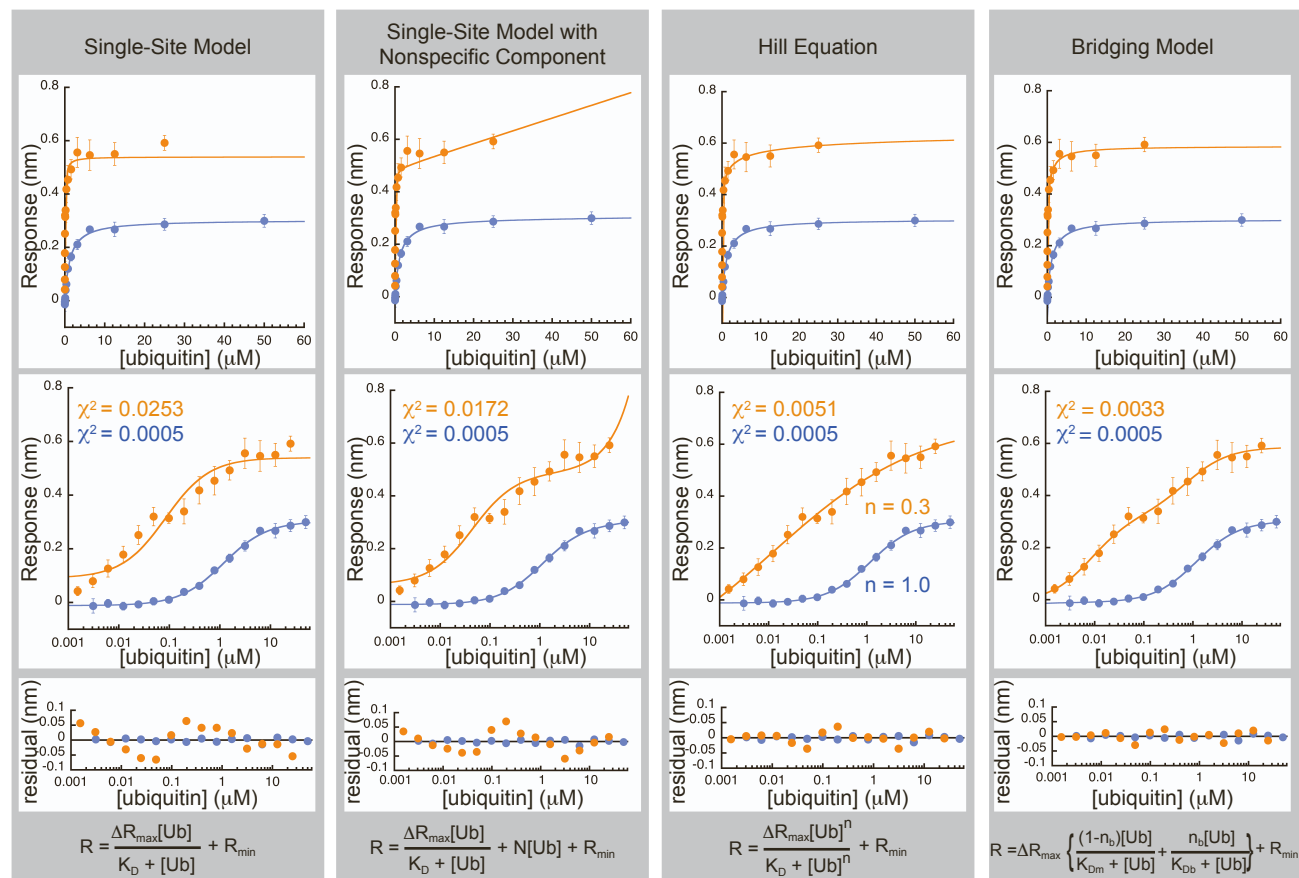

Fig. S6

A

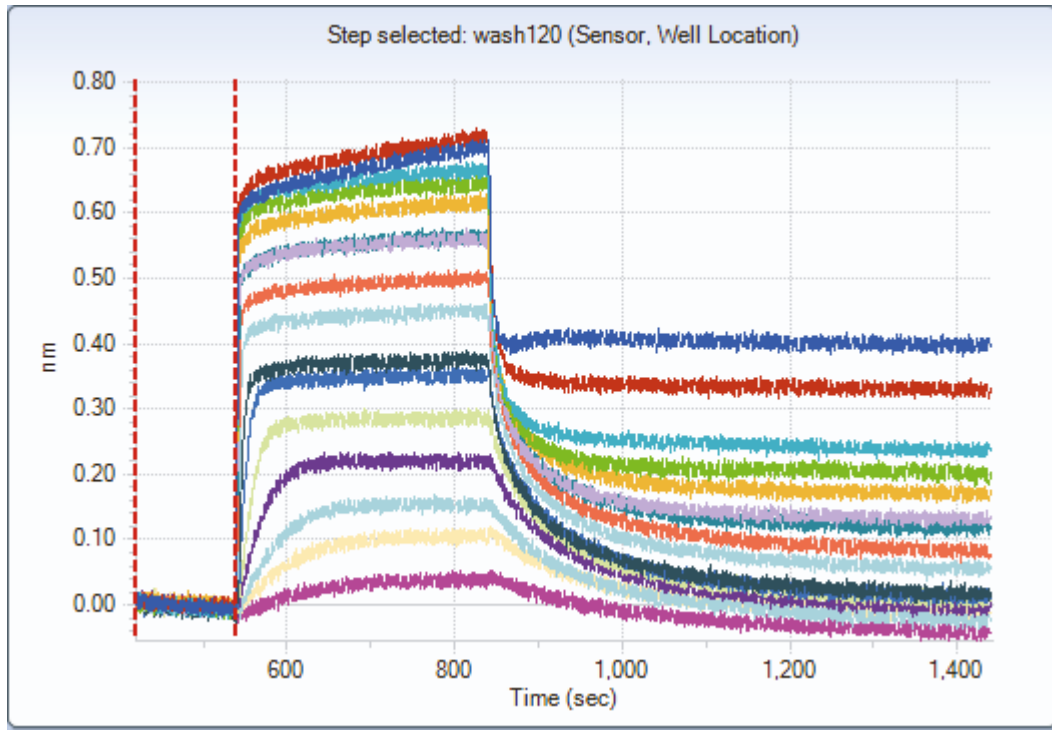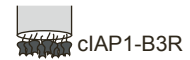

cIAP1-B3R

+ linear tetraubiquitin (∞∞∞)

B

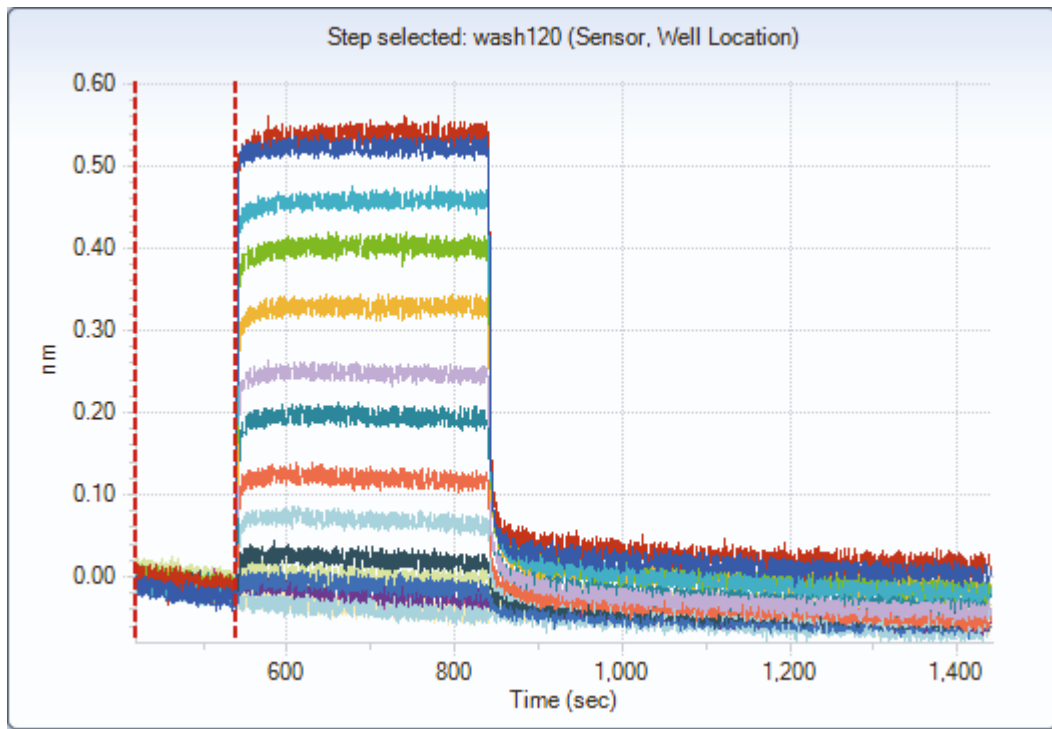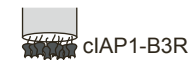

cIAP1-B3R

+ K48 tetraubiquitin (∞∞)



## Supplemental Figure Legends

**Figure S1** Comprehensive analysis of ubiquitin binding by NEMO. **(A)** BLI measurements of monoubiquitin and linear di- and triubiquitin binding to monobiotinylated NEMO<sub>UBAN</sub>. Curves represent fits of the bridging model (left panel) or single-site binding model (right panel) to equilibrium response data. Error bars indicate the standard deviation of three experiments. Fitting residuals, colored as in the fits, are shown below each plot. **(B)** BLI measurements of linear tetraubiquitin binding to monobiotinylated NEMO<sub>UBAN</sub>, as in **a**, but truncated at the intermediate plateau (< 1  $\mu$ M tetraubiquitin). The data are fit to a single-site model and to the bridging model, and residuals are shown below the plot. **(C)** BLI measurements of linear tetraubiquitin binding to monobiotinylated NEMO<sub>UBAN</sub>. Curves represent fits of the bridging model or single-site binding model to equilibrium response data. In this case, the value for  $R_{\min}$  has been set to zero.  $\chi^2$  values for both fitting models and measured loading densities are reported to the right of the plot, followed by fitting residuals for the highest and lowest loading density data. **(D)** The data from **b** are reproduced here, but fit to the bridging model in which  $R_{\min}$  is a fittable parameter. All fitting parameters from these fits may be found in **Table S1**.

**Figure S2** Comprehensive analysis of ubiquitin binding by cIAP1. **(A)** BLI measurements of linear di-, tri- and tetraubiquitin binding to monobiotinylated cIAP1-B3R. Curves represent fits of the bridging model (left panel) or single-site binding model (right panel) to equilibrium response data. Error bars indicate the standard deviation of three experiments. Fitting residuals, colored as in the fits, are shown below each plot. **(B)** BLI measurements of linear tetraubiquitin binding to monobiotinylated cIAP1-B3R. Curves represent fits of the

bridging model or single-site binding model to equilibrium response data.  $\chi^2$  values for both fitting models and measured loading densities are reported to the right of the plot. Fitting residuals for the highest and lowest loading density data are shown in the lower panel. (C) BLI measurements of cIAP1-B3R binding to monobiotinylated monoubiquitin or linear di-, tri- and tetraubiquitin. Curves represent fits of the bridging model (left panel) or single-site binding model (right panel) to equilibrium response data. Error bars indicate the standard deviation of three experiments. Fitting residuals, colored as in the fits, are shown below each plot.  $\chi^2$  values are shown inset. (D) BLI measurements of linear and K48-linked tetraubiquitin binding to monobiotinylated cIAP1-B3R. Curves represent fits of the bridging model (left panel) or single-site binding model (right panel) to equilibrium response data. Error bars indicate the standard deviation of three experiments. Fitting residuals, colored as in the fits, are shown below each plot.  $\chi^2$  values are shown inset. All fitting parameters from these fits may be found in **Table S1**.

**Figure S3** Comprehensive analysis of ubiquitin binding by A20 zinc fingers, part 1. (A) BLI measurements of linear triubiquitin binding to monobiotinylated ZnF7, ZnF4, and ZnF4 with the C624A/C627A binding mutation at ~1 nm loading response. Curves represent fits of the bridging model (left panel) the single-site binding model (middle panel) and the single-site binding model with  $R_{\min}$  set to zero (right panel) to equilibrium response data. Error bars indicate the standard deviation of three experiments. Fitting residuals, colored as in the fits, are shown below each plot.  $\chi^2$  values are shown inset. (B) BLI measurements, as in **a**, of K63-linked triubiquitin binding to monobiotinylated ZnF7 (blue), ZnF4 (purple), and ZnF4 with the C624A/C627A binding mutation (gray). (C) BLI measurements, as in **a**,

of K48-linked triubiquitin binding to monobiotinylated ZnF7 (blue), ZnF4 (purple), and ZnF4 with the C624A/C627A binding mutation (gray). All fitting parameters from these fits may be found in **Table S1**.

**Figure S4.** Comprehensive analysis of ubiquitin binding by A20 zinc fingers, part 2. **(A)** BLI measurements of linear triubiquitin binding to monobiotinylated ZnF7. Curves represent fits of the bridging model (dashed red line) or single-site binding model (solid black line) to equilibrium response data.  $\chi^2$  values for both fitting models and measured loading densities are reported to the right of the plot, followed by fitting residuals for the highest and lowest loading density data. **(B)** BLI measurements of linear triubiquitin binding to monobiotinylated ZnF7 (blue), ZnF4 (purple), and ZnF4 with the C624A/C627A binding mutation (gray) at  $\sim 0.1$  nm loading response. Only the ZnF7 data supported nonlinear fitting. Curves represent fits of the nonequivalent two-site binding model (far left panel) the bridging model (middle left panel), the single-site binding model (middle right panel) and the Hill equation (far right panel) to equilibrium response data. Note that the nonequivalent two-site binding model fits a separate  $\Delta R_{\max}$  to each binding phase, as we cannot assume equal response sizes in BLI data. Error bars indicate the standard deviation of three experiments. Fitting residuals are shown below each plot;  $\chi^2$  values are shown inset. **(C)** BLI measurements of K63-linked triubiquitin binding to monobiotinylated ZnF7, ZnF4, and ZnF4 with the C624A/C627A binding mutation. Only the ZnF4 data supported nonlinear fitting. Curves represent fits of the bridging model (left panel) and the single-site binding model (right panel) to equilibrium response data. Error bars indicate the standard

deviation of three experiments. Fitting residuals are shown below each plot;  $\chi^2$  values are shown inset. All fitting parameters from these fits may be found in **Table S1**.

**Figure S5.** Assessing binding models with example BLI data. BLI measurements of diubiquitin (blue) and tetraubiquitin (orange) binding to monobiotinylated cIAP1-B3R. Curves through the points represent the fit of the following models to the data. First column: single site binding model; second column: single site binding model with a linear non-specific binding component; third column: cooperative model (Hill equation); fourth column: bridging model presented here. Equations are shown below the fits. In all cases, the data are fit using a signal offset ( $R_{\min}$ ) to account for the slight background signal in the absence of analyte, but this term may be removed if data are blanked. The top row shows the data with linear x-axes; the middle row displays the same data and fits with logarithmic x-axes. The bottom row shows residuals from the nonlinear fits.  $\chi^2$  values and n (for the Hill equation) are indicated in the middle row. Error bars indicate the standard deviation of three experiments. Note that the fit to the cooperative model returns a Hill coefficient of less than 1, indicating negative cooperativity. While the fit is reasonable, in this system, bridging is a more plausible explanation for the data than negative cooperativity. Note also that fits to linear diubiquitin data are uniformly good across all models, essentially collapsing to a single-site binding model, while fits to the tetraubiquitin data are best with the bridging model.

**Figure S6.** Example raw sensograms showing association and dissociation phases of BLI response. Monobiotinylated cIAP1-B3R was affixed to streptavidin BLI tips at a standard

~1 nm loading density. Tips were washed to remove unbound protein and then immersed in wells with varying concentrations of either linear tetraubiquitin (**A**) or K48-linked tetraubiquitin (**B**). Data have been normalized to the post-loading wash step. Note that in the case of linear tetraubiquitin, in which bridging artifacts are apparent in the equilibrium binding data, the dissociation phase fails to return to the baseline. In contrast, the data for the more compact K48-linked tetraubiquitin, which we show here displays negligible bridging artifacts in the equilibrium response data, dissociation phases return to near baseline even at the highest ubiquitin concentrations.

**Table S1** Fit parameters for bridging and single-site models

|          | immobilized protein       | analyte                                 | bridging model <sup>a</sup>   |                                    |                                 |                              |                           |                    | single site model <sup>a</sup> |                                |                             |                    |
|----------|---------------------------|-----------------------------------------|-------------------------------|------------------------------------|---------------------------------|------------------------------|---------------------------|--------------------|--------------------------------|--------------------------------|-----------------------------|--------------------|
|          |                           |                                         | fraction bridging             | KDb, $\mu\text{M}$ (bridging)      | KDm, $\mu\text{M}$ (monovalent) | $\Delta R_{\text{max}}$      | Rmin                      | $\chi^2$           | KD, $\mu\text{M}$              | $\Delta R_{\text{max}}$        | Rmin                        | $\chi^2$           |
| Fig. 2 B | NEMOUBAN                  | linear Ub4                              | 0.69 ± 0.03                   | 0.004 ± 0.001                      | 4 ± 2                           | 1.98 ± 0.12                  | -0.31 ± 0.11              | 0.0246             | 0.009 ± 0.004                  | 1.36 ± 0.17                    | -0.077 ± 0.18               | 0.3160             |
|          | NEMOUBAN                  | linear Ub4 (data to < 1 $\mu\text{M}$ ) | 0.57 ± 0.41                   | 0.004 ± 0.001                      | 18 ± 3000                       | 2.4 ± 170                    | -0.30 ± 0.14              | 0.0215             | 0.004 ± 0.001                  | 1.38 ± 0.10                    | -0.29 ± 0.11                | 0.0225             |
|          | NEMOUBAN                  | linear Ub2                              | 0.02 ± 0.02                   | 0.01 ± 0.05                        | 1.0 ± 0.1                       | 0.96 ± 0.02                  | -0.004 ± 0.018            | 0.0014             | 0.97 ± 0.03                    | 0.94 ± 0.01                    | 0.005 ± 0.005               | 0.0016             |
|          | NEMOUBAN                  | Ub                                      | 0.52 ± 1e4                    | -5e-6 ± 0.2                        | 101 ± 14                        | 0.73 ± 2e4                   | -0.37 ± 2e4               | 0.0002             | 102 ± 12                       | 0.35 ± 0.02                    | 0.006 ± 0.001               | 0.0002             |
| Fig. 2 C | NEMOUBAN<br>1nm load      | linear Ub4                              | 0.47 ± 0.05<br>(0.53 ± 0.03)  | 0.005 ± 0.002<br>(0.0025 ± 0.0003) | 10 ± 4<br>(8 ± 3)               | 1.03 ± 0.09<br>(1.13 ± 0.06) | 0.13 ± 0.07<br>(set to 0) | 0.0063<br>(0.0073) | 0.6 ± 0.4<br>(0.006 ± 0.002)   | 0.49 ± 0.07<br>(0.76 ± 0.04)   | 0.43 ± 0.04<br>(set to 0)   | 0.0998<br>(0.1726) |
|          | NEMOUBAN<br>0.73 nm load  | linear Ub4                              | 0.38 ± 0.05<br>(0.44 ± 0.03)  | 0.004 ± 0.002<br>(0.0024 ± 0.0003) | 13 ± 4<br>(11 ± 3)              | 0.77 ± 0.07<br>(0.82 ± 0.05) | 0.07 ± 0.05<br>(set to 0) | 0.0024<br>(0.0026) | 2.2 ± 1.3<br>(0.007 ± 0.003)   | 0.39 ± 0.06<br>(0.47 ± 0.03)   | 0.27 ± 0.02<br>(set to 0)   | 0.0393<br>(0.1030) |
|          | NEMOUBAN<br>0.44 nm load  | linear Ub4                              | 0.36 ± 0.06<br>(0.41 ± 0.04)  | 0.007 ± 0.003<br>(0.004 ± 0.001)   | 14 ± 7<br>(12 ± 5)              | 0.48 ± 0.06<br>(0.49 ± 0.05) | 0.03 ± 0.03<br>(set to 0) | 0.0019<br>(0.0021) | 1.5 ± 0.9<br>(0.01 ± 0.01)     | 0.24 ± 0.04<br>(0.28 ± 0.02)   | 0.13 ± 0.02<br>(set to 0)   | 0.0175<br>(0.0371) |
|          | NEMOUBAN<br>0.09 nm load  | linear Ub4                              | -0.31 ± 160<br>(0.004 ± 0.05) | 0.0001 ± 0.06<br>(-0.001 ± 0.001)  | 0.5 ± 0.3<br>(0.5 ± 0.2)        | 0.05 ± 6<br>(0.07 ± 0.01)    | 0.02 ± 6<br>(set to 0)    | 0.0009<br>(0.0009) | 0.5 ± 0.2<br>(0.5 ± 0.2)       | 0.069 ± 0.006<br>(0.07 ± 0.01) | 0.002 ± 0.004<br>(set to 0) | 0.0009<br>(0.0009) |
| Fig. 3 A | CIAP1-B3R                 | linear Ub4                              | 0.56 ± 0.04                   | 0.03 ± 0.01 <sup>b</sup>           | 3 ± 1 <sup>b</sup>              | 0.60 ± 0.03                  | -0.01 ± 0.03              | 0.0033             | 0.3 ± 0.1 <sup>b</sup>         | 0.45 ± 0.03                    | 0.09 ± 0.03                 | 0.0253             |
|          | CIAP1-B3R                 | linear Ub3                              | 0.60 ± 0.06                   | 0.15 ± 0.04 <sup>b</sup>           | 5 ± 2 <sup>b</sup>              | 0.49 ± 0.01                  | -0.01 ± 0.01              | 0.0013             | 0.6 ± 0.1 <sup>b</sup>         | 0.43 ± 0.02                    | 0.03 ± 0.02                 | 0.0086             |
|          | CIAP1-B3R                 | linear Ub2                              | 0.02 ± 0.29                   | 0.3 ± 5 <sup>b</sup>               | 2 ± 1 <sup>b</sup>              | 0.32 ± 0.01                  | -0.01 ± 0.01              | 0.0005             | 2.3 ± 0.2 <sup>b</sup>         | 0.314 ± 0.005                  | -0.011 ± 0.003              | 0.0005             |
| Fig. 3 B | CIAP1-B3R<br>1.4 nm load  | linear Ub4                              | 0.63 ± 0.08                   | 0.05 ± 0.03 <sup>b</sup>           | 3 ± 2 <sup>b</sup>              | 0.59 ± 0.04                  | 0.07 ± 0.04               | 0.0073             | 0.2 ± 0.1 <sup>b</sup>         | 0.48 ± 0.03                    | 0.13 ± 0.03                 | 0.0220             |
|          | CIAP1-B3R<br>0.73 nm load | linear Ub4                              | 0.46 ± 0.11                   | 0.05 ± 0.04 <sup>b</sup>           | 2 ± 1 <sup>b</sup>              | 0.46 ± 0.03                  | -0.01 ± 0.03              | 0.0039             | 0.5 ± 0.1 <sup>b</sup>         | 0.39 ± 0.02                    | 0.04 ± 0.02                 | 0.0100             |
|          | CIAP1-B3R<br>0.41 nm load | linear Ub4                              | 0.62 ± 0.19                   | 0.4 ± 0.2 <sup>b</sup>             | 5 ± 5 <sup>b</sup>              | 0.20 ± 0.01                  | 0.005 ± 0.004             | 0.0003             | 0.8 ± 0.1 <sup>b</sup>         | 0.18 ± 0.01                    | 0.010 ± 0.004               | 0.0007             |
|          | CIAP1-B3R<br>0.19 nm load | linear Ub4                              | 0.20 ± 0.08                   | 0.1 ± 0.1 <sup>b</sup>             | 4 ± 1 <sup>b</sup>              | 0.17 ± 0.01                  | -0.03 ± 0.01              | 0.0006             | 2.5 ± 0.5 <sup>b</sup>         | 0.15 ± 0.01                    | -0.017 ± 0.004              | 0.0011             |
| Fig. 3 E | linear Ub4                | CIAP1-B3R                               | -0.2 ± 0.5                    | 0.1 ± 0.5                          | 32 ± 3                          | 7.16 ± 3.20                  | 0.79 ± 3                  | 0.1622             | 36 ± 3                         | 8.26 ± 0.16                    | -0.19 ± 0.06                | 0.2406             |
|          | linear Ub3                | CIAP1-B3R                               | -0.3 ± 2                      | 0.1 ± 0.4                          | 35 ± 3                          | 5.95 ± 10                    | 1.24 ± 10                 | 0.1346             | 38 ± 3                         | 7.44 ± 0.15                    | -0.15 ± 0.06                | 0.1965             |
|          | linear Ub2                | CIAP1-B3R                               | -0.3 ± 5                      | 0.03 ± 0.5                         | 39 ± 3                          | 4.98 ± 19                    | 1.20 ± 19                 | 0.0941             | 41 ± 3                         | 6.38 ± 0.13                    | -0.13 ± 0.04                | 0.1224             |
|          | Ub                        | CIAP1-B3R                               | -0.05 ± 0.03                  | 1 ± 2                              | 42 ± 5                          | 5.43 ± 0.19                  | -0.14 ± 0.18              | 0.0637             | 47 ± 3                         | 5.65 ± 0.11                    | -0.25 ± 0.04                | 0.0854             |
| Fig. 3 F | CIAP1-B3R                 | linear Ub4                              | 0.56 ± 0.04                   | 0.03 ± 0.01 <sup>b</sup>           | 3 ± 1 <sup>a</sup>              | 0.60 ± 0.03                  | -0.01 ± 0.03              | 0.0033             | 0.3 ± 0.1 <sup>b</sup>         | 0.45 ± 0.03                    | 0.09 ± 0.03                 | 0.0253             |
|          | CIAP1-B3R                 | K48 Ub4                                 | 0.9 ± 2e11                    | 5 ± 2e7 <sup>b</sup>               | 5 ± 2e8 <sup>b</sup>            | 0.48 ± 0.02                  | 0.01 ± 0.01               | 0.0033             | 5 ± 1 <sup>b</sup>             | 0.48 ± 0.01                    | 0.01 ± 0.01                 | 0.0033             |
| Fig. 4 A | ZnF4                      | linear Ub3                              | 0.26 ± 0.12                   | 2 ± 1                              | 18 ± 6                          | 1.89 ± 0.07                  | 0.01 ± 0.01               | 0.0048             | 9 ± 1<br>(8 ± 1)               | 1.72 ± 0.05<br>(1.72 ± 0.05)   | 0.02 ± 0.01<br>(set to 0)   | 0.0177<br>(0.0218) |
|          | ZnF4                      | K63 Ub3                                 | 0.53 ± 0.03                   | 0.026 ± 0.005                      | 1.5 ± 0.3                       | 1.73 ± 0.03                  | -0.001 ± 0.02             | 0.0087             | 0.16 ± 0.04                    | 1.50 ± 0.07                    | 0.10 ± 0.05                 | 0.1579             |
|          | ZnF4                      | K48 Ub3                                 | 0.02 ± 0.01                   | 0.04 ± 0.09                        | 18 ± 2                          | 2.53 ± 0.07                  | -0.002 ± 0.02             | 0.0103             | 17 ± 1                         | 2.48 ± 0.06                    | 0.02 ± 0.01                 | 0.0134             |
|          | ZnF7                      | linear Ub3                              | 0.58 ± 0.04                   | 0.002 ± 0.001                      | 0.4 ± 0.1                       | 2.00 ± 0.14                  | -0.11 ± 0.13              | 0.0521             | 0.04 ± 0.02<br>(0.010 ± 0.003) | 1.42 ± 0.12<br>(1.69 ± 0.08)   | 0.35 ± 0.11<br>(set to 0)   | 0.4234<br>(0.5882) |
|          | ZnF7                      | K63 Ub3                                 | 0.32 ± 0.01                   | 1.1 ± 0.1                          | 40 ± 6                          | 2.82 ± 0.09                  | 0.01 ± 0.01               | 0.0019             | 6 ± 1                          | 2.10 ± 0.10                    | 0.06 ± 0.03                 | 0.1088             |
|          | ZnF7                      | K48 Ub3                                 | 0.12 ± 0.02                   | 0.06 ± 0.05                        | 13 ± 2                          | 2.11 ± 0.09                  | 0.01 ± 0.03               | 0.0233             | 9 ± 2                          | 1.92 ± 0.11                    | 0.09 ± 0.03                 | 0.0866             |
|          | ZnF4<br>C624A/C627A       | K48 Ub3                                 | 0.03 ± 0.01                   | 0.01 ± 0.02                        | 12 ± 1                          | 2.19 ± 0.05                  | 0.004 ± 0.02              | 0.0071             | 12 ± 1                         | 2.13 ± 0.05                    | 0.03 ± 0.01                 | 0.0116             |
| Fig. 4 B | ZnF7<br>1.0 nm load       | linear Ub4                              | 0.57 ± 0.02                   | 0.005 ± 0.001                      | 0.8 ± 0.2                       | 1.19 ± 0.03                  | 0.02 ± 0.03               | 0.0066             | 0.04 ± 0.02                    | 0.92 ± 0.07                    | 0.18 ± 0.06                 | 0.1155             |
|          | ZnF7<br>0.9 nm load       | linear Ub4                              | 0.56 ± 0.03                   | 0.006 ± 0.001                      | 0.7 ± 0.2                       | 0.89 ± 0.02                  | 0.02 ± 0.02               | 0.0032             | 0.05 ± 0.02                    | 0.71 ± 0.05                    | 0.12 ± 0.04                 | 0.0593             |
|          | ZnF7<br>0.6 nm load       | linear Ub4                              | 0.48 ± 0.04                   | 0.013 ± 0.003                      | 0.6 ± 0.2                       | 0.51 ± 0.01                  | 0.01 ± 0.01               | 0.0010             | 0.10 ± 0.03                    | 0.44 ± 0.02                    | 0.05 ± 0.02                 | 0.0124             |
|          | ZnF7<br>0.3 nm load       | linear Ub4                              | 0.34 ± 0.05                   | 0.02 ± 0.01                        | 1.1 ± 0.3                       | 0.26 ± 0.01                  | 0.005 ± 0.004             | 0.0004             | 0.3 ± 0.1                      | 0.22 ± 0.01                    | 0.02 ± 0.01                 | 0.0026             |
|          | ZnF7<br>0.18 nm load      | linear Ub4                              | 0.20 ± 0.03                   | 0.005 ± 0.004                      | 1.3 ± 0.2                       | 0.115 ± 0.004                | 0.011 ± 0.003             | 0.0001             | 0.8 ± 0.2                      | 0.101 ± 0.005                  | 0.021 ± 0.002               | 0.0004             |
|          | ZnF7<br>0.09 nm load      | linear Ub4                              | 0.24 ± 0.10                   | 0.001 ± 0.001                      | 1.3 ± 0.3                       | 0.09 ± 0.01                  | -0.001 ± 0.01             | 0.0001             | 1.0 ± 0.3                      | 0.070 ± 0.004                  | 0.014 ± 0.002               | 0.0003             |
| Fig. 4 D | ZnF4                      | linear Ub3                              | 0.07 ± 2                      | -6e-5 ± 0.002                      | 47 ± 24                         | 0.25 ± 0.61                  | -0.02 ± 0.62              | 0.0002             | 51 ± 24                        | 0.24 ± 0.08                    | -0.001 ± 0.001              | 0.0002             |
|          | ZnF4                      | K63 Ub3                                 | 0.09 ± 0.13                   | 0.001 ± 0.006                      | 2.1 ± 0.3                       | 0.09 ± 0.01                  | -0.001 ± 0.01             | 0.0003             | 2.0 ± 0.2                      | 0.18 ± 0.01                    | 0.005 ± 0.002               | 0.0004             |
|          | ZnF7                      | linear Ub3                              | 0.25 ± 0.03                   | 0.003 ± 0.002                      | 0.5 ± 0.1                       | 0.21 ± 0.01                  | -0.002 ± 0.007            | 0.0003             | 0.3 ± 0.1                      | 0.18 ± 0.01                    | 0.020 ± 0.005               | 0.0014             |

<sup>a</sup> Values that are italicized and in parenthesis are fitted parameters when R<sub>min</sub> is set to 0

<sup>b</sup> Affinity measurements are normalized to reflect the number of ubiquitin sites in solution for the 1:1 stoichiometry of the CIAP1-B3R:monoubiquitin interaction (i.e. 4x for Ub4, 3x for Ub3 and 2x for Ub2)

**Table S2** Fit parameters for nonequivalent 2-site binding and cooperative binding models

| immobilized protein | analyte    | nonequivalent 2-site binding model |                             |                            |                             |                    |          | cooperative binding model (Hill equation) |                   |                      |                   |          |
|---------------------|------------|------------------------------------|-----------------------------|----------------------------|-----------------------------|--------------------|----------|-------------------------------------------|-------------------|----------------------|-------------------|----------|
|                     |            | $\Delta R_{\max}$ (site 1)         | $KD_1, \mu\text{M}$ (site1) | $\Delta R_{\max}$ (site 2) | $KD_1, \mu\text{M}$ (site2) | Rmin               | $\chi^2$ | $\Delta R_{\max}$                         | $KD, \mu\text{M}$ | n (Hill coefficient) | Rmin              | $\chi^2$ |
| ZnF7                | linear Ub3 | $0.16 \pm 0.01$                    | $0.5 \pm 0.1$               | $0.05 \pm 0.01$            | $0.003 \pm 0.002$           | $-0.002 \pm 0.007$ | 0.0003   | $0.22 \pm 0.02$                           | $0.5 \pm 0.1$     | $0.57 \pm 0.07$      | $0.004 \pm 0.006$ | 0.0005   |
